# Supplementary material
Source: PubMed Central journal article supplement (PMC2739777)
Supplement: 90599.2008_1.pdf [file 90599.2008_1.pdf]

Adiponectin deficiency: a model of pulmonary hypertension associated with pulmonary  
vascular disease

Ross Summer<sup>1</sup>, Christopher A. Fiack<sup>1</sup>, Yasumasa Ikeda<sup>2</sup>, Kaori Sato<sup>2</sup>, Daniel Dwyer<sup>1</sup>,  
Noriyuki Ouchi<sup>2</sup>, Alan Fine<sup>1</sup>, Harrison W. Farber<sup>1</sup>, Kenneth Walsh<sup>2</sup>

<sup>1</sup> The Pulmonary Center, R-304  
Boston University School of Medicine  
80 East Concord St.  
Boston, MA 02118

<sup>2</sup> Whitaker Cardiovascular Institute/Molecular Cardiology  
Boston University School of Medicine  
715 Albany Street, W611  
Boston, MA 02118

\*Correspondence: Ross Summer

Running title: Adiponectin and pulmonary hypertension  
Supplemental table and figures

This work was supported by National Institute of Health Grants K08 HL077138, AG15052,  
HL-59215, and Gilead Sciences Research Scholars Program in Pulmonary Arterial  
Hypertension.

Supplemental table 1:

Right ventricle cardiac echocardiographic measurements

|                | WT 3 M      | APN +/- 3M     |
|----------------|-------------|----------------|
| Number of mice | 5           | 5              |
| RVDd (mm)      | 1.73+/-0.05 | 1.708 +/- 0.05 |
| PA ACT (msec)  | 18±1.1      | 20±0.9         |

RVDd Right ventricular dimensions, PA ACT Pulmonary artery acceleration time

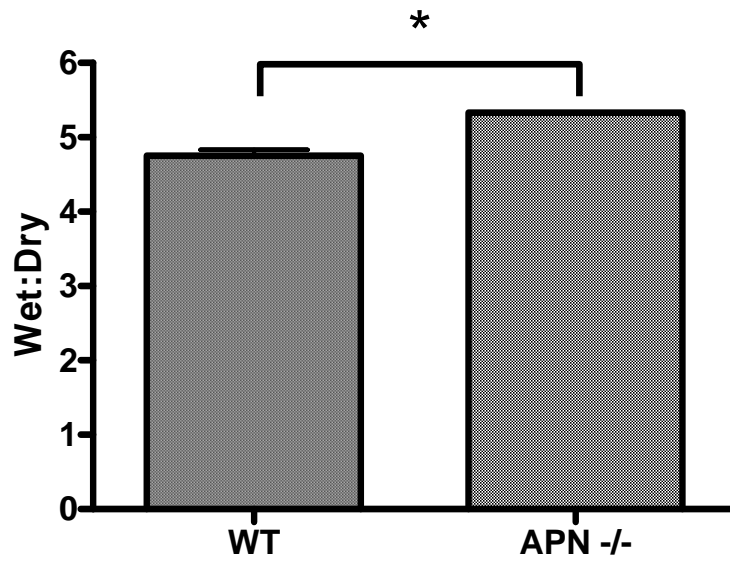

Supplemental figure 1: Wet to dry ratio was slightly, but significantly increased in lungs of APN deficient mice at 3 months of age.

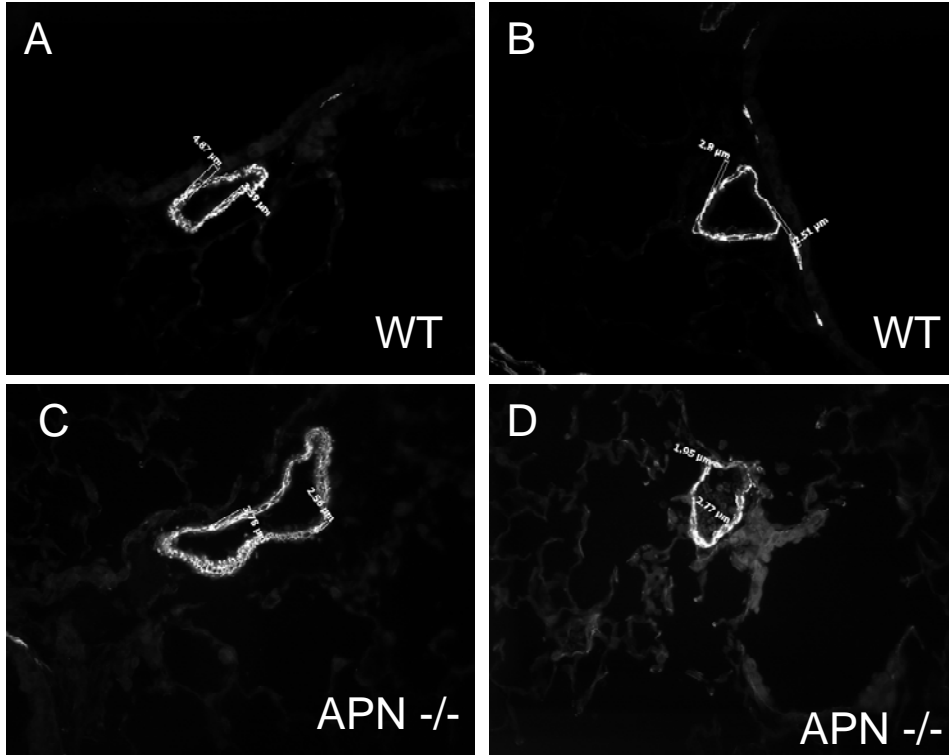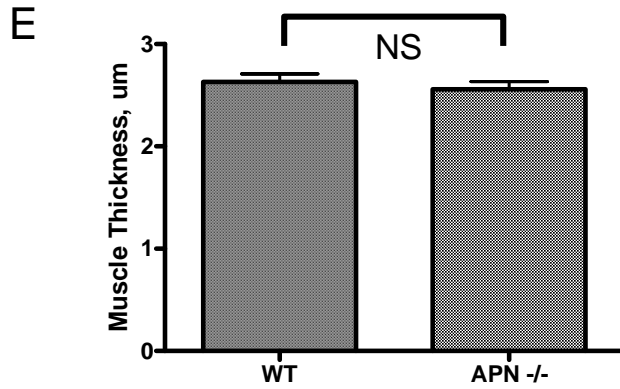

Supplemental figure 2: Vascular smooth muscle thickness was not statistically different in wild-type, WT (A, B) and adiponectin (APN) deficient (C, D) lungs at 1 year of age. E) Summary of results from measuring smooth muscle thickness in lungs of WT and APN deficient mice at 1 year of age (50 blood vessels of similar size were measured in each group).
